# Supplementary material for: Three dimensionally printed mesoporous bioactive glass and poly(3-hydroxybutyrate-co-3-hydroxyhexanoate) composite scaffolds for bone regeneration
Source: Royal Society of Chemistry journal article supplement (doi:10.1039/c4tb00838c), 2014-07-08
Supplement: c4tb00838c1.pdf [file c4tb00838c1.pdf]

## Supporting Information

### **Three dimensionally printed mesoporous bioactive glass and poly(3-hydroxybutyrate-co-3-hydroxyhexanoate) composite scaffolds for bone regeneration**

Shichang Zhao,<sup>†a</sup> Min Zhu,<sup>†b</sup> Jianhua Zhang,<sup>bc</sup> Yadong Zhang,<sup>a</sup> Zhongtang Liu,<sup>d</sup> Yufang Zhu<sup>\*b</sup> and Changqing Zhang<sup>\*a</sup>

<sup>a</sup> Department of Orthopaedics, Shanghai Sixth People's Hospital, Shanghai Jiaotong University, 600 Yishan Road, Shanghai 200233, People's Republic of China.

<sup>b</sup> School of Materials Science and Engineering, University of Shanghai for Science and Technology, 516 Jungong Road, Shanghai 200093, People's Republic of China.

<sup>c</sup> School of Medical Instrument and Food Engineering, University of Shanghai for Science and Technology, 516 Jungong Road, Shanghai 200093, People's Republic of China.

<sup>d</sup> Department of Orthopaedics, Changhai Hospital, Second Military Medical University, 174 Changhai Road Shanghai 200433, People's Republic of China.

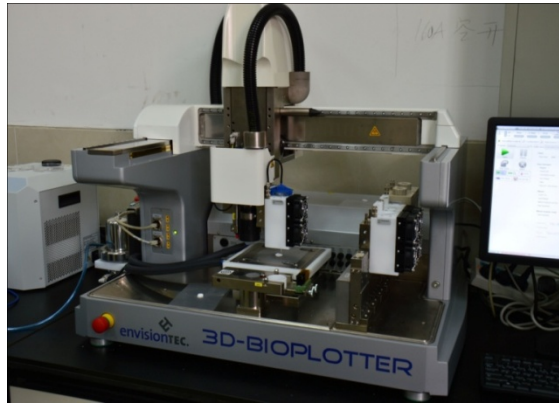

**Fig.1s** The 4<sup>th</sup> generation of 3D-Bioplotter system (EnvisionTEC, Germany) used in printing all MBG-based composite scaffolds. MBG/polymer pastes were inserted into the syringe and then compressed out by air pressure to plot the cylindrical scaffolds under the three-axi positioning system.

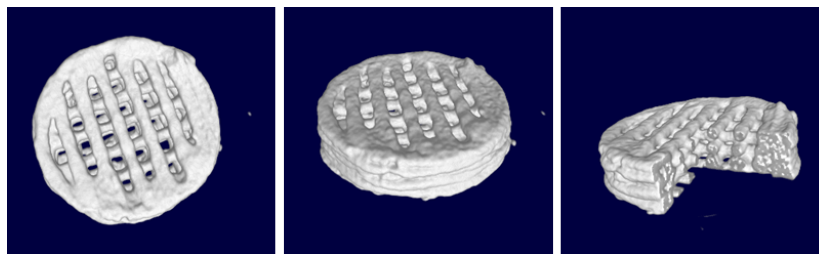

**Fig.2s** Typical micro-CT images of a representative MPH-3 scaffold. The strands followed an alternative X-Y pattern as designed in advance, which thus resulted in well-defined square open pore structure.

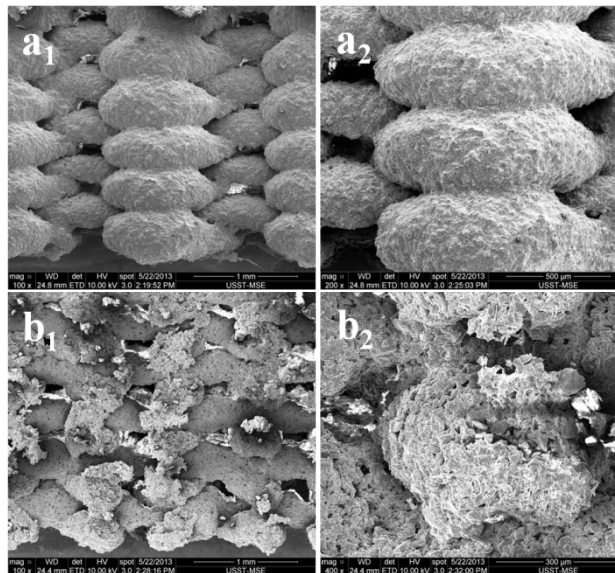

**Fig.3s** SEM images of a representative MPH-3 scaffold (a1,a2) side view; (b1,b2) cross-section.

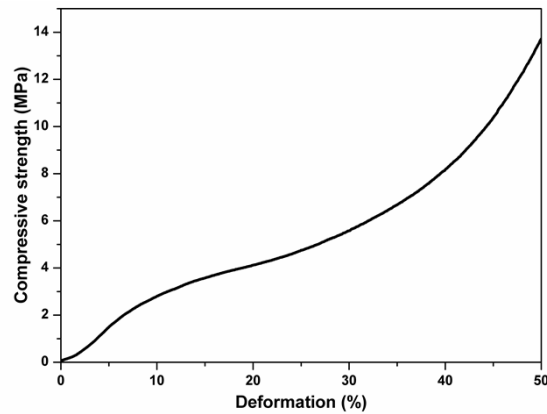

**Fig.4s** Stress vs. deformation response of one representative MPH-7 scaffold in compression.

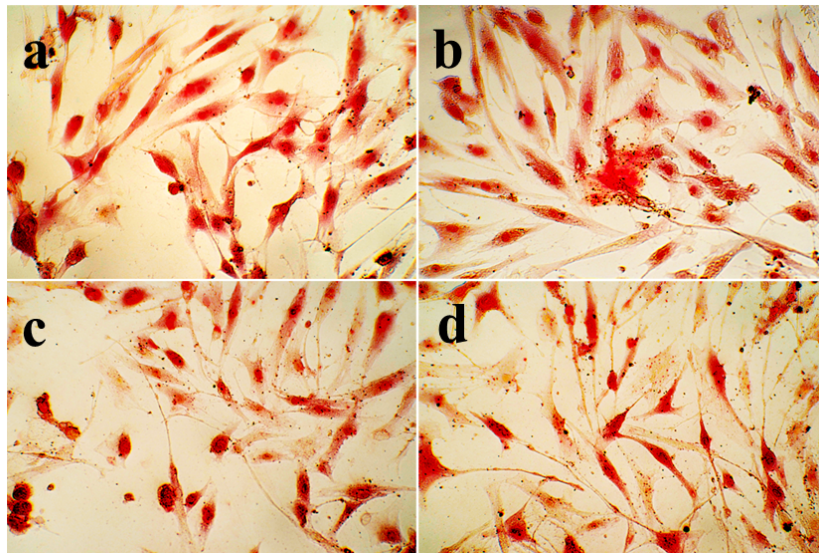

**Fig.5s** The ability of (a) MPV, (b) MPH-7, (c) MPH-5 and (d) MPH-3 scaffolds to support extracellular matrix (ECM) mineralization of the hBMSCs was studied using the Alizarin red S assay (Genmed Scientifics Inc., U.S.A). After 14 days culture, cells detached from all the testing scaffolds were rinsed with PBS for 3 times and fixed in 4% (w/v) paraformaldehyde (PFA) for 15 min at room temperature and stained for 15 min with 2% (w/v) Alizarin Red S solution at pH 4.2. The cells were washed extensively with distilled water and viewed under a phase contrast light microscope.
